# Supplementary material for: Fine-Mapping, Gene Expression and Splicing Analysis of the Disease Associated LRRK2 Locus
Source: PLoS One. 2013 Aug 13;8(8):e70724. doi: 10.1371/journal.pone.0070724 (PMC3742662; doi:10.1371/journal.pone.0070724)
Supplement: Table S7 — Number of sequencing reads spanning exon-exon junctions in the 8 samples with RNA-Seq data. Results are organised by: (top) canonical transcript, annotated junctions (middle) non-canonical transcript, annotated junctions (bottom) novel junctions. (CSV) [file pone.0070724.s010.csv]

start	end	start.exons	end.exons	overlaps.exons.29.35	OCTX-1	OCTX-2	OCTX-3	OCTX-4	SNIG-1	SNIG-2	SNIG-3	SNIG-4
40749990	40753061	ENST00000298910_LRRK2_46	ENST00000298910_LRRK2_47	FALSE	45	36	67	29	31	31	18	48
40677936	40681152	ENST00000298910_LRRK2_19	ENST00000298910_LRRK2_20	FALSE	62	27	98	32	16	16	18	33
40681342	40687346	ENST00000298910_LRRK2_20	ENST00000298910_LRRK2_21	FALSE	55	38	86	23	15	15	19	37
40748295	40749916	ENST00000298910_LRRK2_45	ENST00000298910_LRRK2_46	FALSE	49	30	54	24	29	30	20	41
40689447	40692044	ENST00000298910_LRRK2_23	ENST00000298910_LRRK2_24	FALSE	56	25	70	27	16	32	8	42
40657704	40668384	ENST00000298910_LRRK2_14	ENST00000298910_LRRK2_15	FALSE	40	23	97	15	22	16	25	37
40653407	40657590	ENST00000298910_LRRK2_13	ENST00000298910_LRRK2_14	FALSE	50	14	75	11	23	22	22	51
40734257	40740554	ENST00000298910_LRRK2_41	ENST00000298910_LRRK2_42	FALSE	39	16	68	31	23	30	20	37
40688717	40689228	ENST00000298910_LRRK2_22	ENST00000298910_LRRK2_23	FALSE	39	25	84	30	5	29	12	37
40717109	40722161	ENST00000298910_LRRK2_38	ENST00000298910_LRRK2_39	FALSE	33	24	58	33	27	30	22	26
40728960	40734095	ENST00000298910_LRRK2_40	ENST00000298910_LRRK2_41	FALSE	51	8	55	31	24	26	29	29
40651180	40653281	ENST00000298910_LRRK2_12	ENST00000298910_LRRK2_13	FALSE	38	20	75	11	20	13	20	53
40668530	40668655	ENST00000298910_LRRK2_15	ENST00000298910_LRRK2_16	FALSE	44	19	80	13	13	19	16	43
40722263	40728768	ENST00000298910_LRRK2_39	ENST00000298910_LRRK2_40	FALSE	32	24	47	30	28	39	23	23
40687466	40688646	ENST00000298910_LRRK2_21	ENST00000298910_LRRK2_22	FALSE	42	27	74	28	8	22	11	33
40740726	40742210	ENST00000298910_LRRK2_42	ENST00000298910_LRRK2_43	FALSE	38	26	55	21	21	26	19	37
40760880	40761445	ENST00000298910_LRRK2_50	ENST00000298910_LRRK2_51	FALSE	23	28	64	14	26	19	27	31
40629517	40631770	ENST00000298910_LRRK2_4	ENST00000298910_LRRK2_5	FALSE	46	19	70	18	13	20	9	37
40745536	40748100	ENST00000298910_LRRK2_44	ENST00000298910_LRRK2_45	FALSE	40	22	46	19	16	23	19	44
40631906	40634284	ENST00000298910_LRRK2_5	ENST00000298910_LRRK2_6	FALSE	35	22	49	20	14	25	12	36
40714991	40715836	ENST00000298910_LRRK2_35	ENST00000298910_LRRK2_36	FALSE	34	16	55	15	31	24	15	22
40626186	40629427	ENST00000298910_LRRK2_3	ENST00000298910_LRRK2_4	FALSE	37	23	63	11	13	23	10	26
40668796	40671689	ENST00000298910_LRRK2_16	ENST00000298910_LRRK2_17	FALSE	44	11	75	16	8	11	17	23
40742312	40745340	ENST00000298910_LRRK2_43	ENST00000298910_LRRK2_44	FALSE	28	34	47	18	18	21	13	26
40646819	40651049	ENST00000298910_LRRK2_11	ENST00000298910_LRRK2_12	FALSE	42	16	55	10	8	17	13	41
40753247	40757203	ENST00000298910_LRRK2_47	ENST00000298910_LRRK2_48	FALSE	37	18	44	23	25	16	19	19
40716313	40716961	ENST00000298910_LRRK2_37	ENST00000298910_LRRK2_38	FALSE	27	16	47	23	17	23	14	32
40672064	40677676	ENST00000298910_LRRK2_18	ENST00000298910_LRRK2_19	FALSE	38	14	60	26	3	13	15	25
40715984	40716120	ENST00000298910_LRRK2_36	ENST00000298910_LRRK2_37	FALSE	25	19	44	15	19	22	13	27
40757357	40758643	ENST00000298910_LRRK2_48	ENST00000298910_LRRK2_49	FALSE	21	24	45	21	17	21	11	20
40692296	40692910	ENST00000298910_LRRK2_24	ENST00000298910_LRRK2_25	FALSE	26	10	39	29	11	16	12	26
40713978	40714835	ENST00000298910_LRRK2_34	ENST00000298910_LRRK2_35	TRUE	21	14	35	15	29	21	8	24
40671819	40671892	ENST00000298910_LRRK2_17	ENST00000298910_LRRK2_18	FALSE	41	6	54	16	9	6	15	19
40645347	40646711	ENST00000298910_LRRK2_10	ENST00000298910_LRRK2_11	FALSE	30	15	44	12	8	7	10	33
40634420	40637351	ENST00000298910_LRRK2_6	ENST00000298910_LRRK2_7	FALSE	37	13	30	11	13	11	13	29
40637484	40643627	ENST00000298910_LRRK2_7	ENST00000298910_LRRK2_8	FALSE	27	13	29	11	5	13	11	21
40643748	40645033	ENST00000298910_LRRK2_8	ENST00000298910_LRRK2_9	FALSE	24	15	29	13	10	11	11	15
40707976	40709013	ENST00000298910_LRRK2_32	ENST00000298910_LRRK2_33	TRUE	23	10	29	16	6	15	8	19
40709103	40713789	ENST00000298910_LRRK2_33	ENST00000298910_LRRK2_34	TRUE	20	9	28	20	11	17	7	11
40619443	40626075	ENST00000298910_LRRK2_2	ENST00000298910_LRRK2_3	FALSE	23	12	23	8	9	4	11	25
40645177	40645266	ENST00000298910_LRRK2_9	ENST00000298910_LRRK2_10	FALSE	27	7	35	11	4	5	8	18
40704452	40707773	ENST00000298910_LRRK2_31	ENST00000298910_LRRK2_32	TRUE	20	10	16	4	8	8	17	11
40758853	40760807	ENST00000298910_LRRK2_49	ENST00000298910_LRRK2_50	FALSE	8	0	32	11	9	4	10	13
40697937	40699586	ENST00000298910_LRRK2_27	ENST00000298910_LRRK2_28	FALSE	10	3	22	8	7	5	10	19
40702499	40702907	ENST00000298910_LRRK2_29	ENST00000298910_LRRK2_30	TRUE	14	7	27	9	1	8	6	10
40703036	40704232	ENST00000298910_LRRK2_30	ENST00000298910_LRRK2_31	TRUE	14	5	21	16	5	5	9	6
40696685	40697749	ENST00000298910_LRRK2_26	ENST00000298910_LRRK2_27	FALSE	17	4	23	3	5	4	8	12
40699769	40702268	ENST00000298910_LRRK2_28	ENST00000298910_LRRK2_29	FALSE	5	4	18	9	4	2	9	16
40693060	40696590	ENST00000298910_LRRK2_25	ENST00000298910_LRRK2_26	FALSE	13	3	16	8	6	5	3	12
40619085	40619356	ENST00000298910_LRRK2_1	ENST00000298910_LRRK2_2	FALSE	12	9	12	3	4	9	1	14
Predicted junctions but non-canonical transcript
40706711	40707773	ENST00000481256_LRRK2_1	ENST00000481256_LRRK2_2	TRUE	0	1	0	0	0	0	0	1
40693060	40694614	ENST00000430804_LRRK2_3	ENST00000430804_LRRK2_4	FALSE	0	0	0	1	0	0	0	0
Non-predicted junctions
40758857	40760811	NA	NA	FALSE	18	25	38	6	18	18	16	22
40760862	40761445	NA	ENST00000298910_LRRK2_51	FALSE	3	8	18	1	4	4	4	5
40709103	40714835	ENST00000298910_LRRK2_33	ENST00000298910_LRRK2_35	TRUE	1	1	3	0	4	3	0	1
40645928	40646711	NA	ENST00000298910_LRRK2_11	FALSE	1	1	6	0	0	0	0	4
40709103	40710079	ENST00000298910_LRRK2_33	NA	TRUE	2	1	2	0	3	0	0	3
40657704	40668460	ENST00000298910_LRRK2_14	NA	FALSE	3	0	3	0	0	0	0	0
40697937	40702268	ENST00000298910_LRRK2_27	ENST00000298910_LRRK2_29	FALSE	1	1	4	0	0	0	0	0
40710206	40713789	NA	ENST00000298910_LRRK2_34	TRUE	1	0	0	0	4	0	0	1
40740726	40745340	ENST00000298910_LRRK2_42	ENST00000298910_LRRK2_44	FALSE	0	0	0	0	2	0	0	2
40646819	40653281	ENST00000298910_LRRK2_11	ENST00000298910_LRRK2_13	FALSE	3	0	1	0	0	0	0	0
40601059	40601342	NA	NA	FALSE	1	0	1	0	1	0	0	0
40689442	40692044	NA	ENST00000298910_LRRK2_24	FALSE	0	0	0	3	0	0	0	0
40742312	40748100	ENST00000298910_LRRK2_43	ENST00000298910_LRRK2_45	FALSE	0	0	0	0	0	0	3	0
40704452	40709013	ENST00000298910_LRRK2_31	ENST00000298910_LRRK2_33	TRUE	0	1	0	1	1	0	0	0
40621469	40626075	NA	ENST00000298910_LRRK2_3	FALSE	2	0	0	0	0	0	0	0
40728960	40740554	ENST00000298910_LRRK2_40	ENST00000298910_LRRK2_42	FALSE	0	0	0	0	0	1	1	0
40601800	40602666	NA	NA	FALSE	1	0	0	1	0	0	0	0
40592191	40592358	NA	NA	FALSE	0	1	0	0	0	0	0	1
40722263	40722541	ENST00000298910_LRRK2_39	NA	FALSE	0	0	1	0	0	0	0	1
40710206	40714835	NA	ENST00000298910_LRRK2_35	TRUE	0	0	2	0	0	0	0	0
40745536	40749916	ENST00000298910_LRRK2_44	ENST00000298910_LRRK2_46	FALSE	0	0	2	0	0	0	0	0
40592464	40597253	NA	NA	FALSE	0	1	0	0	0	0	0	1
40646819	40651079	ENST00000298910_LRRK2_11	NA	FALSE	0	0	1	1	0	0	0	0
40601426	40601592	NA	NA	FALSE	1	0	0	0	1	0	0	0
40758801	40760807	NA	ENST00000298910_LRRK2_50	FALSE	1	0	0	0	0	0	0	0
40681342	40687355	ENST00000298910_LRRK2_20	NA	FALSE	0	0	1	0	0	0	0	0
40646819	40651059	ENST00000298910_LRRK2_11	NA	FALSE	1	0	0	0	0	0	0	0
40645177	40646711	ENST00000298910_LRRK2_9	ENST00000298910_LRRK2_11	FALSE	0	0	1	0	0	0	0	0
40697937	40699233	ENST00000298910_LRRK2_27	NA	FALSE	0	0	1	0	0	0	0	0
40704452	40704635	ENST00000298910_LRRK2_31	NA	TRUE	0	0	0	0	0	0	1	0
40688717	40692044	ENST00000298910_LRRK2_22	ENST00000298910_LRRK2_24	FALSE	0	0	0	0	0	0	0	1
40645347	40645806	ENST00000298910_LRRK2_10	NA	FALSE	1	0	0	0	0	0	0	0
40653407	40668384	ENST00000298910_LRRK2_13	ENST00000298910_LRRK2_15	FALSE	0	0	1	0	0	0	0	0
40621719	40626075	NA	ENST00000298910_LRRK2_3	FALSE	1	0	0	0	0	0	0	0
40689447	40692168	ENST00000298910_LRRK2_23	NA	FALSE	0	1	0	0	0	0	0	0
40646819	40668384	ENST00000298910_LRRK2_11	ENST00000298910_LRRK2_15	FALSE	0	0	1	0	0	0	0	0
40619443	40621692	ENST00000298910_LRRK2_2	NA	FALSE	1	0	0	0	0	0	0	0
40699280	40699586	NA	ENST00000298910_LRRK2_28	FALSE	0	0	1	0	0	0	0	0
40645351	40646711	NA	ENST00000298910_LRRK2_11	FALSE	0	0	1	0	0	0	0	0
40646819	40657590	ENST00000298910_LRRK2_11	ENST00000298910_LRRK2_14	FALSE	0	0	0	0	0	0	0	1
40699769	40700908	ENST00000298910_LRRK2_28	NA	FALSE	0	1	0	0	0	0	0	0
